# Supplementary material
Source: PubMed Central journal article supplement (PMC4879402)

Diversilab v3.6  
 PC  
 #1408

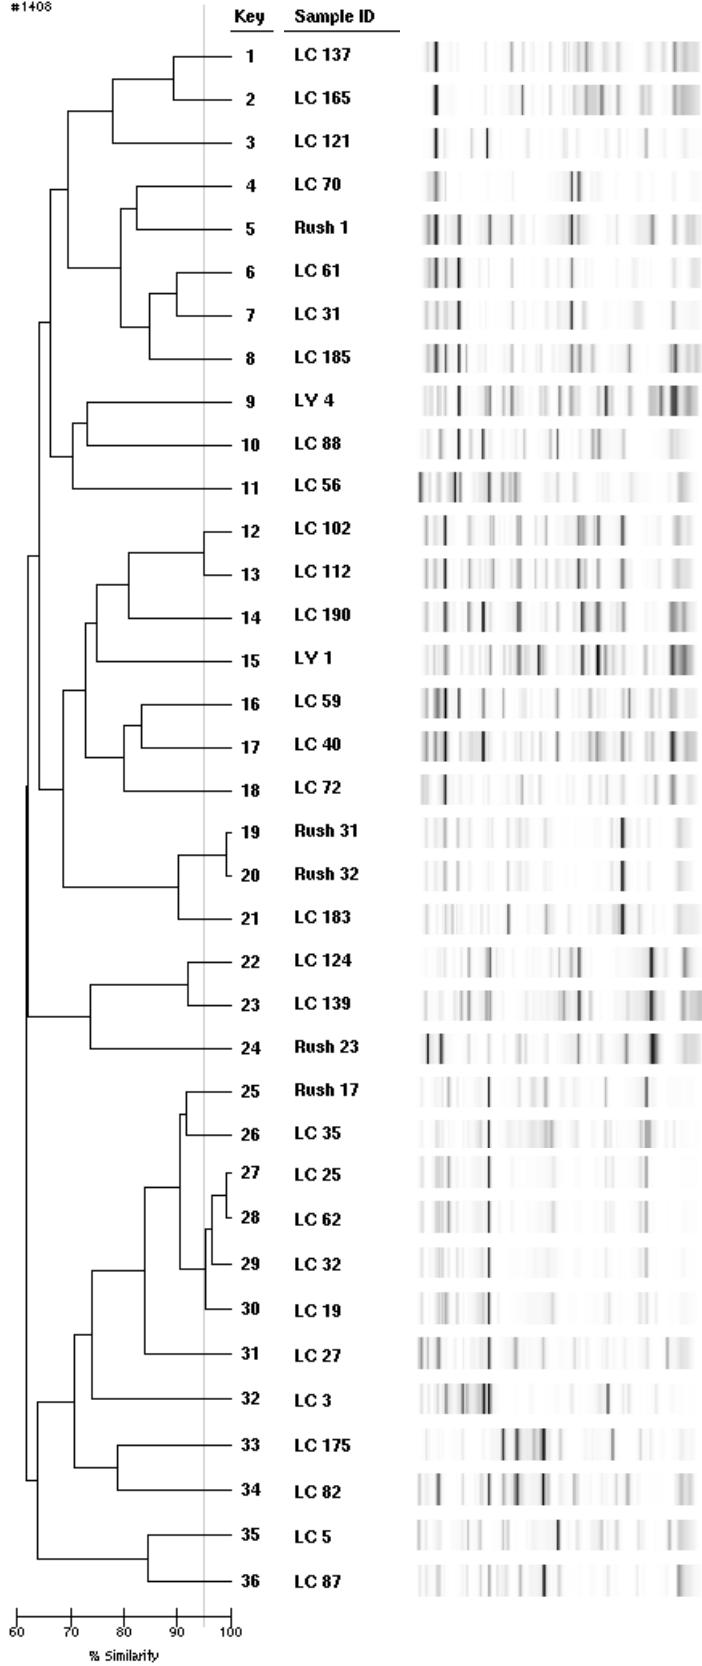

Supplement: AAC.00098-16_zac006165205so1.pdf [file AAC.00098-16_zac006165205so1.pdf]
